# Supplementary material
Source: PubMed Central journal article supplement (PMC4988918)

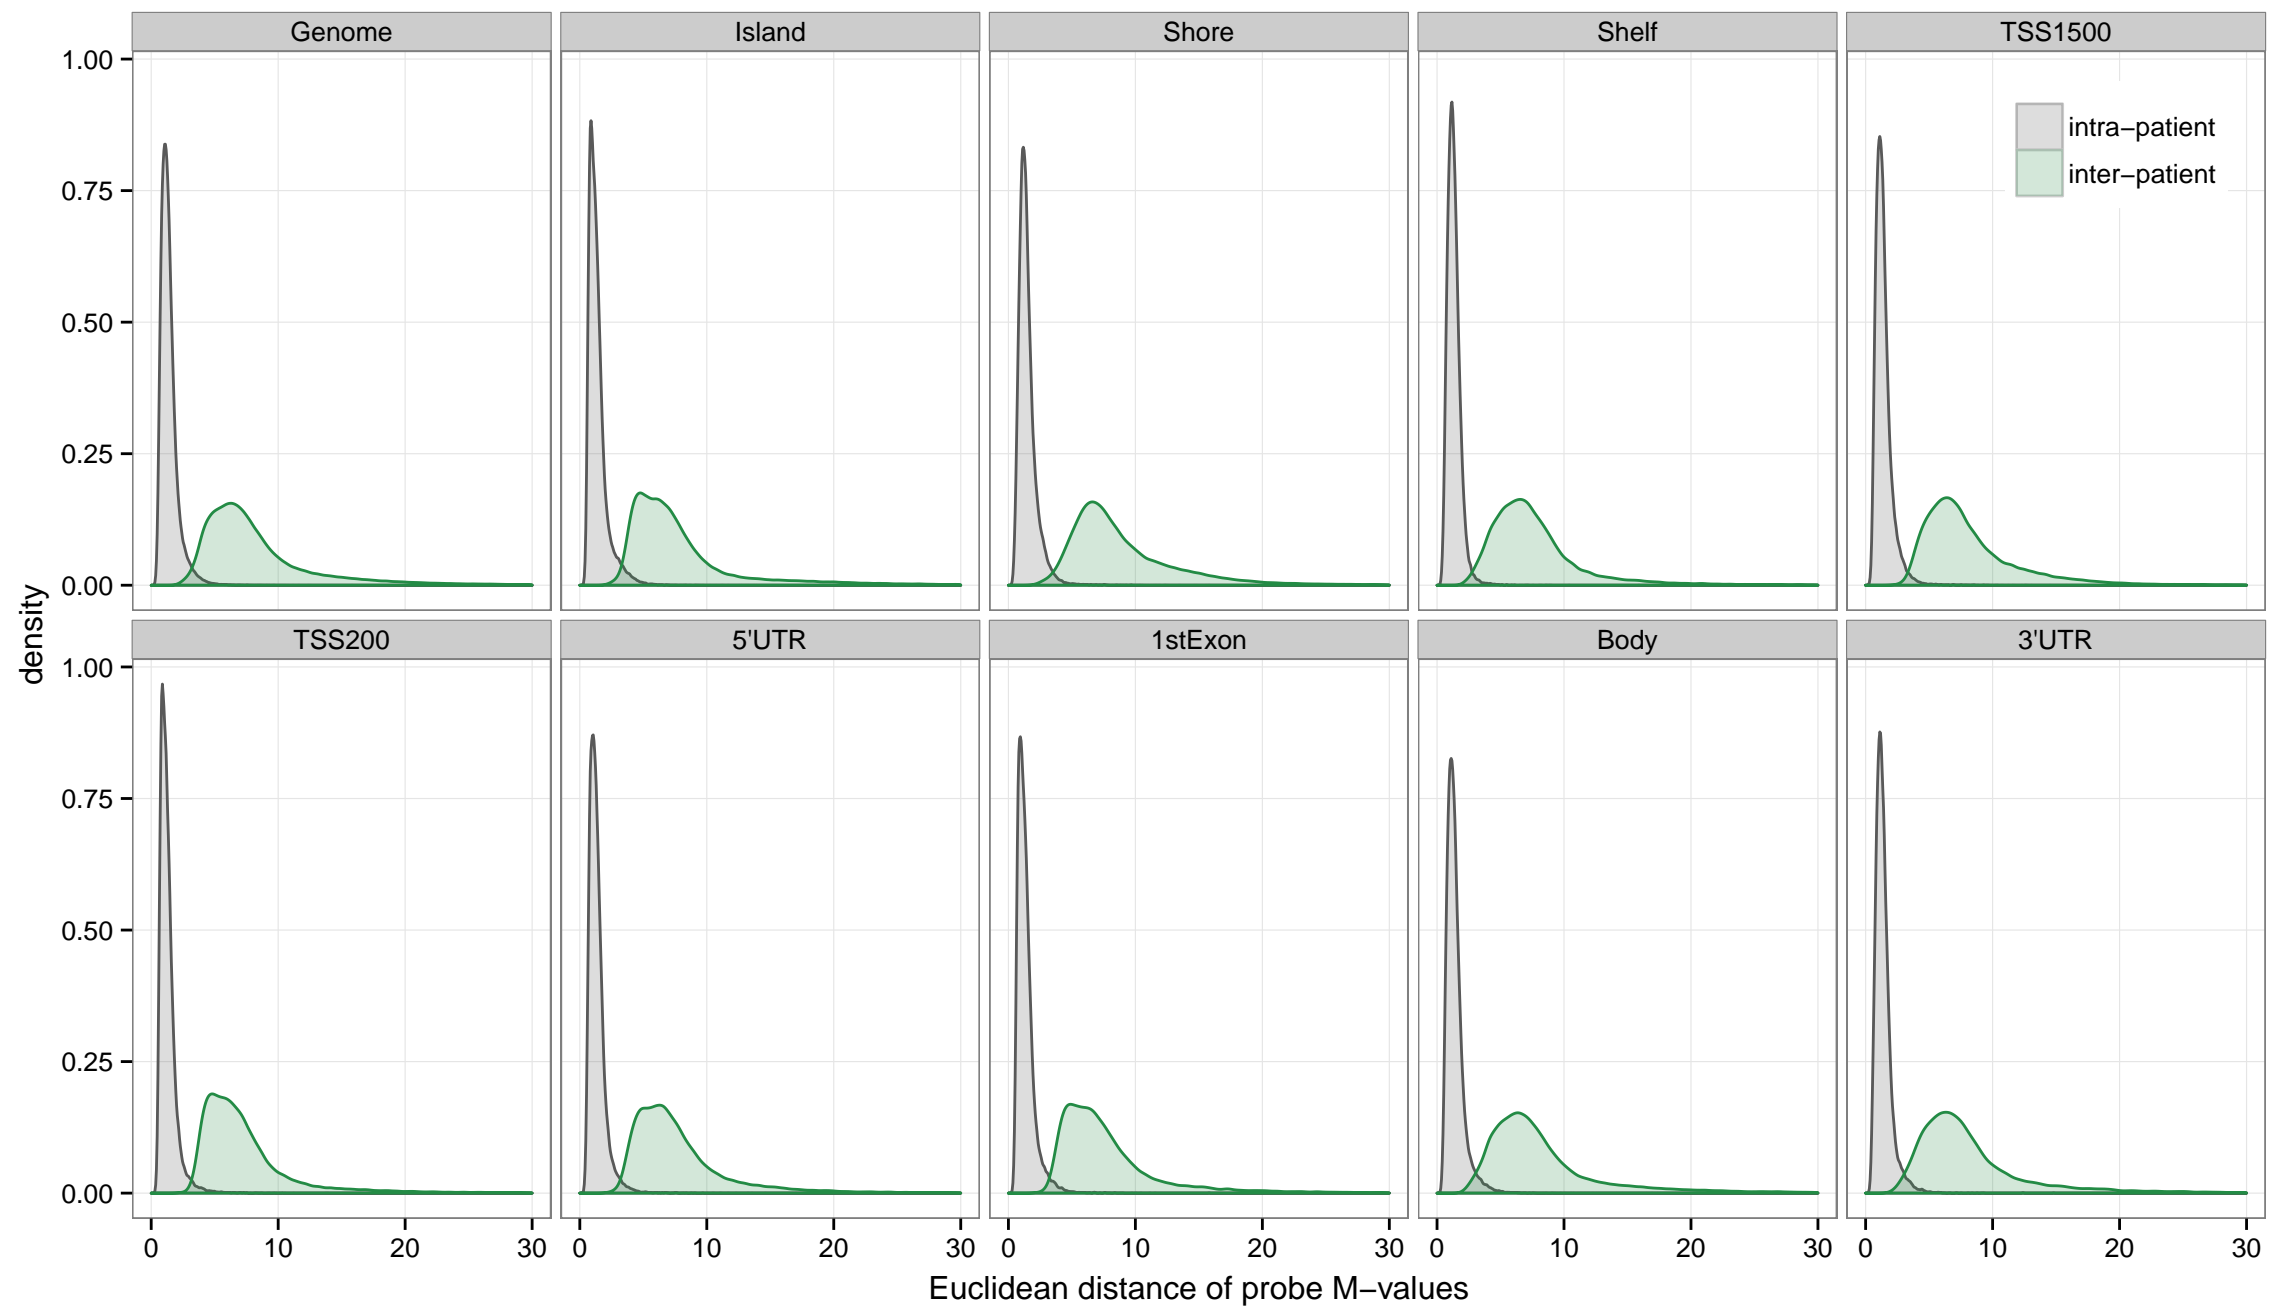

Supplement: NIHMS753609-supplement-Supp_Fig_S3.pdf [file NIHMS753609-supplement-Supp_Fig_S3.pdf]
